# Supplementary material for: Evidence-Based Exercise Recommendations to Improve Mental Wellbeing in Women with Breast Cancer during Active Treatment: A Systematic Review and Meta-Analysis
Source: PubMed Central journal article supplement (PMC7828164; doi:10.3390/cancers13020264), 2021-01-12
Supplement: cancers-13-00264-s001.pdf [file cancers-13-00264-s001.pdf]

# Supplementary Material: Evidence-Based Exercise Recommendations to Improve Mental Wellbeing in Women with Breast Cancer During Active Treatment: A Systematic Review and Meta-Analysis

Robinson Ramírez-Vélez, Fabiola Zambom-Ferraresi, Antonio García-Hermoso, Justina Kievisiene, Alona Rauckiene-Michealsson and César Agostinis-Sobrinho

**Table S1.** Search strategy implemented in three electronic databases and results of total records.

|                |                                                                                                                                                                                                                                                                                                                                                                                                                                                                                                                                                                                                                                                                                                                                                                                                                                                                                                                                                                                                              |             |
|----------------|--------------------------------------------------------------------------------------------------------------------------------------------------------------------------------------------------------------------------------------------------------------------------------------------------------------------------------------------------------------------------------------------------------------------------------------------------------------------------------------------------------------------------------------------------------------------------------------------------------------------------------------------------------------------------------------------------------------------------------------------------------------------------------------------------------------------------------------------------------------------------------------------------------------------------------------------------------------------------------------------------------------|-------------|
| Pubmed         | ((randomized controlled trial[Publication Type]) OR (controlled clinical trial[Publication Type]) OR ("randomi*" [Title/Abstract]) OR (trial[Title]) OR (clinical trials[MeSH Major Topic])) AND (breast[Title/Abstract]) AND ((cancer[Title/Abstract]) OR (neoplasm[Title/Abstract]) OR ("tumour*" [Title/Abstract]) OR ("tumor*" [Title/Abstract]) OR ("carcino*" [Title/Abstract]) OR ("Leukaemi*" [Title/Abstract]) OR ("Leukemi*" [Title/Abstract])) AND ((Physical activity[Title/Abstract]) OR (exercise[Title/Abstract]) OR (aerobic[Title/Abstract]) OR (endurance[Title/Abstract]) OR (resistance[Title/Abstract]) OR (strength[Title/Abstract]) OR (flexibility[Title/Abstract]) OR (stretching[Title/Abstract])) AND ((mental wellbeing[Title/Abstract]) OR (mental health[Title/Abstract]) OR (mood states[Title/Abstract]) OR (anxiety[Title/Abstract]) OR (depression[Title/Abstract]) OR ("quality of life" [Title/Abstract]) OR (self-esteem[Title/Abstract]) OR (fatigue[Title/Abstract])) | 651         |
| WOS            | TS= (randomized controlled trial OR cross over controlled trial* OR controlled clinical trial OR randomi* OR trial) AND TI=breast AND TI= (cancer OR neoplasm* OR tumour* OR tumor* OR carcino* leukaemi* OR leukemi*) AND TI= (physical activity OR exercise OR aerobic OR endurance OR resistance OR strength OR flexibility OR stretching) AND AB= (mental wellbeing OR mental health OR mood states OR anxiety OR depression OR quality of life OR self-esteem OR fatigue)                                                                                                                                                                                                                                                                                                                                                                                                                                                                                                                               | 443         |
| Ovid           | TI (randomized controlled trial OR cross over controlled trial* OR controlled clinical trial OR randomi* OR trial) AND TI breast AND TI (cancer OR neoplasm* OR tumour* OR tumor* OR carcino* leukaemi* OR leukemi*) AND TI (physical activity OR exercise OR aerobic OR endurance OR resistance OR strength OR flexibility OR stretching) AND AB (mental wellbeing OR mental health OR mood states OR anxiety OR depression OR quality of life OR self-esteem OR fatigue)                                                                                                                                                                                                                                                                                                                                                                                                                                                                                                                                   | 378         |
| <b>Overall</b> |                                                                                                                                                                                                                                                                                                                                                                                                                                                                                                                                                                                                                                                                                                                                                                                                                                                                                                                                                                                                              | <b>1472</b> |

N = 1472, duplicates = 875 (Eliminated with Zotero).

**Table S2.** Assessment of methodological quality and risk of bias with PEDro scale.

| Study                            | Q1 | Q2 | Q3 | Q4 | Q5 | Q6 | Q7 | Q8 | Q9 | Q10 | Total (0 to 10) |
|----------------------------------|----|----|----|----|----|----|----|----|----|-----|-----------------|
| Adams (2016) [25]                | Y  | Y  | Y  | N  | N  | N  | N  | N  | Y  | Y   | 5               |
| Ammitzboll (2019) [26]           | Y  | N  | Y  | N  | N  | N  | N  | Y  | Y  | Y   | 5               |
| Baglia (2019) [27]               | Y  | Y  | Y  | N  | N  | N  | Y  | Y  | Y  | Y   | 7               |
| Basen-Engquist (2020) [28]       | Y  | Y  | Y  | N  | N  | N  | Y  | Y  | Y  | N   | 6               |
| Bloomquist (2019) [29]           | Y  | N  | Y  | N  | N  | Y  | N  | Y  | Y  | Y   | 6               |
| Cadmus (2009) [30]               | Y  | Y  | Y  | N  | N  | N  | Y  | Y  | Y  | Y   | 7               |
| Campbell (2005) [31]             | Y  | N  | Y  | N  | N  | N  | Y  | N  | Y  | Y   | 5               |
| Cantarero-Villanueva (2013) [32] | Y  | Y  | Y  | N  | N  | Y  | Y  | N  | Y  | Y   | 7               |
| Cantarero-Villanueva (2011) [33] | Y  | Y  | Y  | N  | N  | Y  | N  | Y  | Y  | Y   | 7               |
| Carayol (2019) [34]              | Y  | Y  | Y  | N  | N  | N  | Y  | Y  | Y  | Y   | 7               |
| Casla (2015) [35]                | Y  | Y  | Y  | N  | N  | N  | Y  | N  | Y  | Y   | 6               |
| Cormie (2013) [36]               | Y  | Y  | Y  | N  | N  | N  | Y  | Y  | Y  | Y   | 7               |
| Cornette (2016) [37]             | Y  | N  | Y  | N  | N  | N  | N  | Y  | Y  | Y   | 5               |
| Courneya (2003) [38]             | Y  | N  | Y  | N  | N  | Y  | Y  | Y  | Y  | Y   | 7               |
| Courneya (2007) [39]             | Y  | Y  | Y  | N  | N  | N  | Y  | Y  | Y  | Y   | 7               |

|                                 |   |   |   |   |   |   |   |   |   |   |   |
|---------------------------------|---|---|---|---|---|---|---|---|---|---|---|
| Daley (2007) [40]               | Y | Y | Y | N | N | N | Y | Y | Y | Y | 7 |
| Dieli (2018) [41]               | Y | Y | Y | N | N | N | Y | N | Y | Y | 6 |
| Dong (2019) [42]                | Y | Y | Y | N | N | Y | N | N | Y | Y | 6 |
| Ergun (2013) [43]               | Y | N | Y | N | N | Y | Y | N | Y | Y | 6 |
| Fernández-Lao (2013) [44]       | Y | Y | Y | N | N | N | Y | Y | Y | Y | 7 |
| Fillion (2008) [45]             | Y | Y | Y | N | N | N | Y | Y | Y | Y | 7 |
| Galiano-Castillo (2016) [46]    | Y | Y | Y | N | N | Y | Y | Y | Y | Y | 8 |
| Ghavami and Akyolcu (2017) [47] | Y | Y | Y | N | N | N | Y | N | Y | Y | 6 |
| Gokal (2016) [48]               | Y | N | Y | N | N | N | N | Y | Y | Y | 5 |
| Hagstrom (2016) [49]            | Y | Y | Y | N | N | N | Y | Y | Y | Y | 7 |
| Harvie (2019) [50]              | Y | N | Y | N | N | N | Y | Y | Y | Y | 6 |
| Hayes (2013) [51]               | Y | N | Y | N | N | Y | Y | Y | Y | Y | 7 |
| Herrero (2006) [52]             | Y | Y | Y | N | N | Y | N | N | Y | Y | 6 |
| Huang (2019) [53]               | Y | N | Y | N | N | Y | N | Y | Y | Y | 6 |
| Hwang (2008) [54]               | Y | N | Y | N | N | N | Y | N | Y | Y | 5 |
| Ligibel (2016) [55]             | Y | N | Y | N | N | Y | Y | N | Y | Y | 6 |
| Mijwel (2019) [56]              | Y | N | Y | N | N | N | Y | Y | Y | Y | 6 |
| Milne (2008) [57]               | Y | Y | Y | N | N | N | Y | Y | Y | Y | 7 |
| Murtezani (2014) [58]           | Y | N | Y | N | N | Y | N | N | Y | Y | 5 |
| Musanti (2012) [59]             | Y | Y | Y | N | N | Y | N | N | Y | Y | 6 |
| Mutrie (2007) [60]              | Y | Y | Y | N | N | Y | Y | Y | Y | Y | 8 |
| Naraphong (2015) [61]           | Y | Y | Y | N | N | N | Y | Y | Y | Y | 7 |
| Ohira (2006) [62]               | Y | N | Y | N | N | Y | Y | N | Y | Y | 6 |
| Paulo (2019) [63]               | Y | N | Y | N | N | N | N | Y | Y | Y | 5 |
| Pinto (2005) [64]               | Y | N | T | N | N | N | Y | Y | Y | Y | 6 |
| Reis (2018) [65]                | Y | Y | Y | N | N | Y | Y | Y | Y | Y | 8 |
| Rogers (2015) [66]              | Y | Y | N | N | N | Y | Y | Y | Y | Y | 7 |
| Rogers (2017) [67]              | Y | Y | N | N | N | Y | Y | Y | Y | Y | 7 |
| Saarto (2012) [68]              | Y | N | Y | N | N | N | Y | N | Y | Y | 5 |
| Saxton (2104) [69]              | Y | Y | Y | N | N | Y | Y | Y | Y | Y | 8 |
| Schmidt (2012) [70]             | Y | N | Y | N | N | N | Y | N | Y | Y | 5 |
| Schmidt (2015) [71]             | Y | Y | Y | N | N | N | Y | Y | Y | Y | 7 |
| Schmidt (2015b) [72]            | Y | Y | Y | N | N | N | N | N | Y | Y | 5 |
| Schmidt (2016) [73]             | Y | N | Y | N | N | N | N | Y | Y | Y | 5 |
| Scott (2013) [74]               | Y | Y | Y | N | N | Y | Y | Y | Y | Y | 8 |
| Segal (2001) [75]               | Y | N | Y | N | N | N | N | Y | Y | Y | 5 |
| Shobeiri (2016) [76]            | Y | N | Y | N | N | N | Y | Y | Y | Y | 6 |
| Speck (2010) [77]               | Y | N | Y | N | N | Y | N | N | Y | Y | 5 |
| Steindorf (2014) [78]           | Y | Y | Y | N | N | N | Y | Y | Y | Y | 7 |
| Travier (2015) [79]             | Y | Y | Y | N | N | Y | Y | Y | Y | Y | 8 |
| Wang (2011) [80]                | Y | N | Y | N | N | N | Y | N | Y | Y | 5 |
| Winters (2012) [81]             | Y | Y | Y | N | N | Y | N | Y | Y | Y | 7 |

Q1: Random allocation; Q2: Concealed allocation; Q3: Groups similar at baseline; Q4: Participant blinding; Q5: Therapist Blinding; Q6: Assessor Blinding; Q7: Adequate follow-up; Q8: Intention to treat analysis; Q9: Between-group difference reported; Q10: Point estimate and variability reported.

**Table S3.** Exercise effects on mental health parameters.

| Mental health parameter | Studies (n) | Cohen’s d | 95% CI         | p      | I <sup>2</sup> | Egger  |
|-------------------------|-------------|-----------|----------------|--------|----------------|--------|
| Anxiety                 | 10          | -0.22     | -0.43 to -0.01 | 0.039  | 53.0           | 0.988  |
| Body image              | 12          | 0.27      | 0.01 to 0.54   | 0.046  | 69.2           | 0.542  |
| Depression              | 17          | -0.24     | -0.40 to -0.07 | 0.008  | 66.6           | 0.210  |
| Fatigue                 | 39          | -0.47     | -0.60 to -0.34 | <0.001 | 69.8           | <0.001 |
| Happiness               | 3           | 0.29      | -0.46 to 1.03  | 0.280  | 21.5           | 0.651  |
| Self-esteem             | 10          | 0.24      | -0.01 to 0.50  | 0.081  | 41.5           | 0.731  |

|                                       |    |       |               |        |      |        |
|---------------------------------------|----|-------|---------------|--------|------|--------|
| Sleep disturbance                     | 4  | -0.68 | -2.12 to 0.76 | 0.229  | 88.1 | 0.354  |
| Stress                                | 4  | -0.24 | -0.66 to 0.18 | 0.843  | 0    | 0.394  |
| <b>Health-Related Quality of Life</b> |    |       |               |        |      |        |
| Overall                               | 20 | 0.46  | 0.24 to 0.68  | <0.001 | 71.6 | <0.001 |
| FACT-B                                | 13 | 0.60  | 0.27 to 0.93  | <0.001 | 76.2 | 0.267  |
| Emotional function                    | 21 | 0.33  | 0.16 to 0.50  | <0.001 | 65.7 | 0.002  |

**Table S4.** Exercise effects on mental health parameters according to training programs characteristics.

| Mental health parameter               | Studies (n) | Cohen's d | 95% CI         | p      | I <sup>2</sup> |
|---------------------------------------|-------------|-----------|----------------|--------|----------------|
| <b>Fatigue</b>                        |             |           |                |        |                |
| Aerobic training                      | 16          | -0.49     | -0.75 to -0.24 | 0.001  | 78.9           |
| Resistance training                   | 9           | -0.23     | -0.43 to -0.03 | 0.029  | 27.2           |
| Concurrent training                   | 16          | -0.59     | -0.79 to -0.38 | <0.001 | 62.5           |
| <150 min/week                         | 24          | -0.37     | -0.51 to -0.23 | <0.001 | 59.3           |
| ≥150 min/week                         | 13          | -0.65     | -0.93 to -0.38 | <0.001 | 76.3           |
| Moderate intensity                    | 21          | -0.50     | -0.66 to -0.34 | <0.001 | 48.0           |
| Moderate-to-vigorous intensity        | 15          | -0.28     | -0.47 to -0.09 | 0.008  | 64.7           |
| Vigorous intensity                    | 5           | -0.97     | -1.70 to -0.24 | 0.021  | 71.7           |
| <b>Stress</b>                         |             |           |                |        |                |
| Aerobic training                      | 3           | -0.20     | -0.91 to 0.50  | 0.339  | 0              |
| <b>Self-esteem</b>                    |             |           |                |        |                |
| Aerobic training                      | 7           | 0.28      | -0.08 to 0.64  | 0.107  | 53.7           |
| Resistance training                   | 3           | 0.18      | -0.60 to 0.97  | 0.417  | 17.3           |
| <150 min/week                         | 7           | 0.22      | -0.15 to 0.60  | 0.199  | 50.0           |
| ≥150 min/week                         | 3           | 0.28      | -0.51 to 1.07  | 0.268  | 38.2           |
| Moderate intensity                    | 5           | 0.15      | -0.34 to 0.63  | 0.450  | 51.7           |
| Moderate-to-vigorous intensity        | 3           | 0.28      | -0.51 to 1.07  | 0.268  | 38.2           |
| <b>Anxiety</b>                        |             |           |                |        |                |
| Aerobic training                      | 5           | -0.15     | -0.53 to 0.23  | 0.333  | 54.3           |
| Concurrent training                   | 4           | -0.35     | -0.97 to 0.27  | 0.172  | 69.7           |
| <150 min/week                         | 6           | -0.23     | -0.55 to 0.09  | 0.126  | 59.5           |
| ≥150 min/week                         | 4           | -0.21     | -0.73 to 0.31  | 0.290  | 52.2           |
| Moderate intensity                    | 5           | -0.47     | -0.72 to -0.22 | 0.006  | 0              |
| Moderate-to-vigorous intensity        | 5           | -0.02     | -0.25 to 0.21  | 0.827  | 0              |
| <b>Depression</b>                     |             |           |                |        |                |
| Aerobic training                      | 7           | -0.20     | -0.49 to 0.08  | 0.131  | 65.1           |
| Resistance training                   | 3           | -0.03     | -0.46 to 0.40  | 0.809  | 0              |
| Concurrent training                   | 7           | -0.37     | -0.72 to -0.02 | 0.043  | 70.7           |
| <150 min/week                         | 11          | -0.16     | -0.36 to 0.03  | 0.088  | 64.0           |
| ≥150 min/week                         | 6           | -0.39     | -0.75 to -0.04 | 0.037  | 50.7           |
| Moderate intensity                    | 4           | -0.28     | -0.66 to 0.10  | 0.102  | 31.9           |
| Moderate-to-vigorous intensity        | 13          | -0.24     | -0.44 to -0.07 | 0.028  | 70.9           |
| <b>Body image</b>                     |             |           |                |        |                |
| Aerobic training                      | 3           | 0.70      | -0.57 to 1.98  | 0.141  | 71.3           |
| Resistance training                   | 4           | 0.12      | -0.61 to 0.85  | 0.631  | 79.8           |
| Concurrent training                   | 5           | 0.12      | -0.17 to 0.41  | 0.309  | 0              |
| <150 min/week                         | 6           | 0.36      | -0.03 to 0.75  | 0.062  | 62.5           |
| ≥150 min/week                         | 6           | 0.18      | -0.35 to 0.71  | 0.432  | 75.2           |
| Moderate intensity                    | 6           | 0.02      | -0.25 to 0.30  | 0.840  | 0              |
| Moderate-to-vigorous intensity        | 3           | 0.42      | -0.78 to 1.61  | 0.272  | 72.7           |
| <b>Sleep disturbance</b>              |             |           |                |        |                |
| Aerobic training                      | 3           | -0.83     | -3.42 to 1.77  | 0.303  | 89.9           |
| <b>Health-Related Quality of Life</b> |             |           |                |        |                |
| <b>Overall</b>                        |             |           |                |        |                |
| Aerobic training                      | 10          | 0.58      | 0.15 to 1.01   | 0.014  | 83.8           |

|                                |    |      |               |       |      |
|--------------------------------|----|------|---------------|-------|------|
| Resistance training            | 6  | 0.24 | -0.01 to 0.48 | 0.056 | 0    |
| Concurrent training            | 4  | 0.55 | -0.55 to 1.65 | 0.209 | 69.4 |
| <150 min/week                  | 15 | 0.49 | 0.25 to 0.73  | 0.001 | 62.6 |
| ≥150 min/week                  | 5  | 0.40 | -0.42 to 1.22 | 0.250 | 75.8 |
| Moderate intensity             | 7  | 0.48 | 0.20 to 0.76  | 0.006 | 0    |
| Moderate-to-vigorous intensity | 8  | 0.38 | -0.13 to 0.89 | 0.119 | 80.8 |
| Vigorous intensity             | 3  | 0.48 | -0.34 to 1.31 | 0.495 | 0    |
| <b>Emotional function</b>      |    |      |               |       |      |
| Aerobic training               | 9  | 0.36 | 0.04 to 0.68  | 0.032 | 70.1 |
| Resistance training            | 6  | 0.20 | -0.12 to 0.52 | 0.174 | 43.6 |
| Concurrent training            | 6  | 0.43 | -0.03 to 0.89 | 0.063 | 72.5 |
| <150 min/week                  | 13 | 0.30 | 0.03 to 0.57  | 0.033 | 73.1 |
| ≥150 min/week                  | 8  | 0.39 | 0.21 to 0.58  | 0.001 | 0    |
| Moderate intensity             | 8  | 0.34 | 0.08 to 0.61  | 0.017 | 41.7 |
| Moderate-to-vigorous intensity | 9  | 0.25 | -0.09 to 0.60 | 0.128 | 77.0 |
| Vigorous intensity             | 4  | 0.58 | 0.07 to 1.09  | 0.036 | 0    |
| <b>FACT-B</b>                  |    |      |               |       |      |
| Aerobic training               | 6  | 0.43 | -0.01 to 0.86 | 0.051 | 59.7 |
| Concurrent training            | 7  | 0.76 | 0.18 to 1.35  | 0.019 | 83.0 |
| <150 min/week                  | 6  | 0.83 | 0.14 to 1.53  | 0.027 | 82.7 |
| ≥150 min/week                  | 7  | 0.45 | 0.06 to 0.84  | 0.029 | 68.6 |
| Moderate intensity             | 5  | 0.82 | -0.03 to 1.66 | 0.055 | 82.4 |
| Moderate-to-vigorous intensity | 7  | 0.43 | 0.01 to 0.86  | 0.048 | 73.5 |

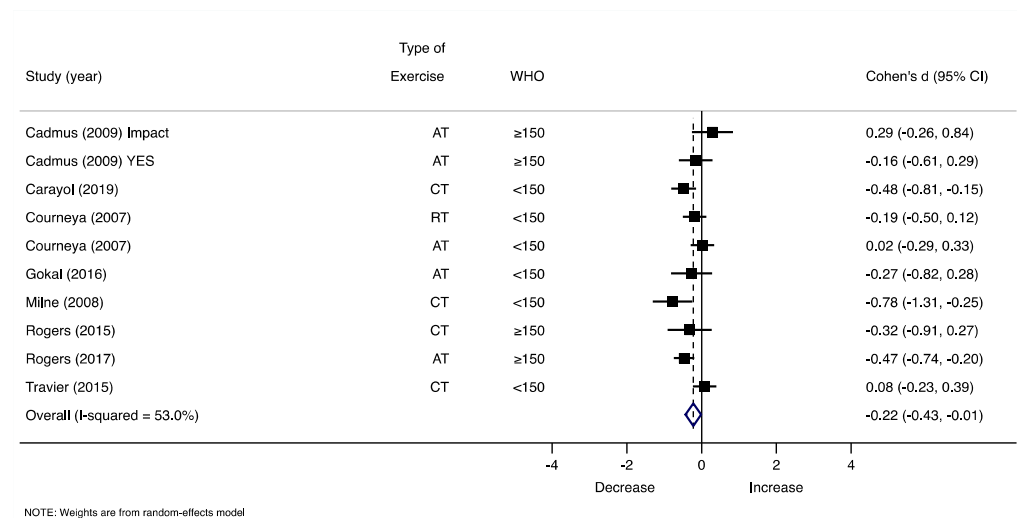

**Figure S5.** Forest plot about the exercise effects on anxiety. AT, aerobic training; CT, concurrent training.

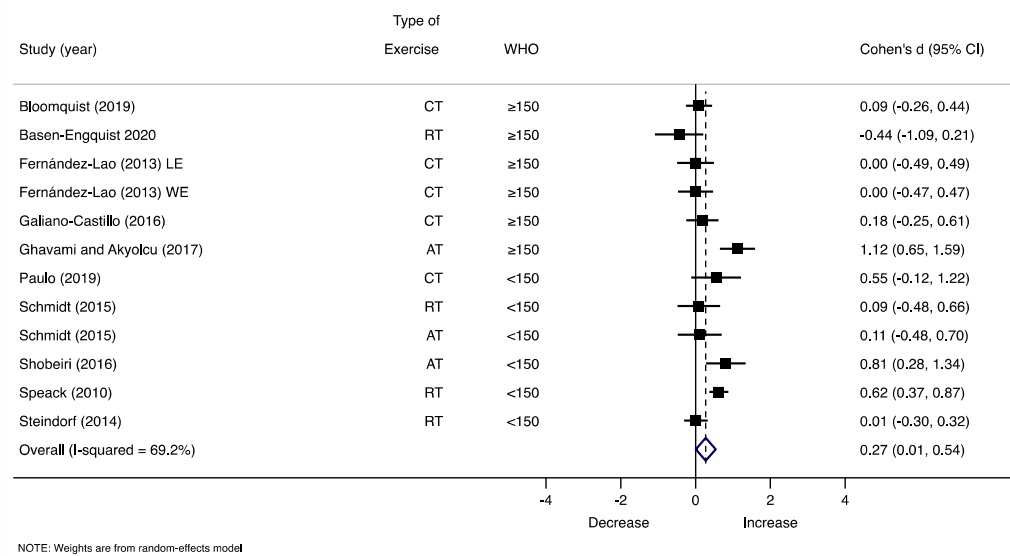

**Figure S6.** Forest plot about the exercise effects on body image. AT, aerobic training; CT, concurrent training; RT, resistance training.

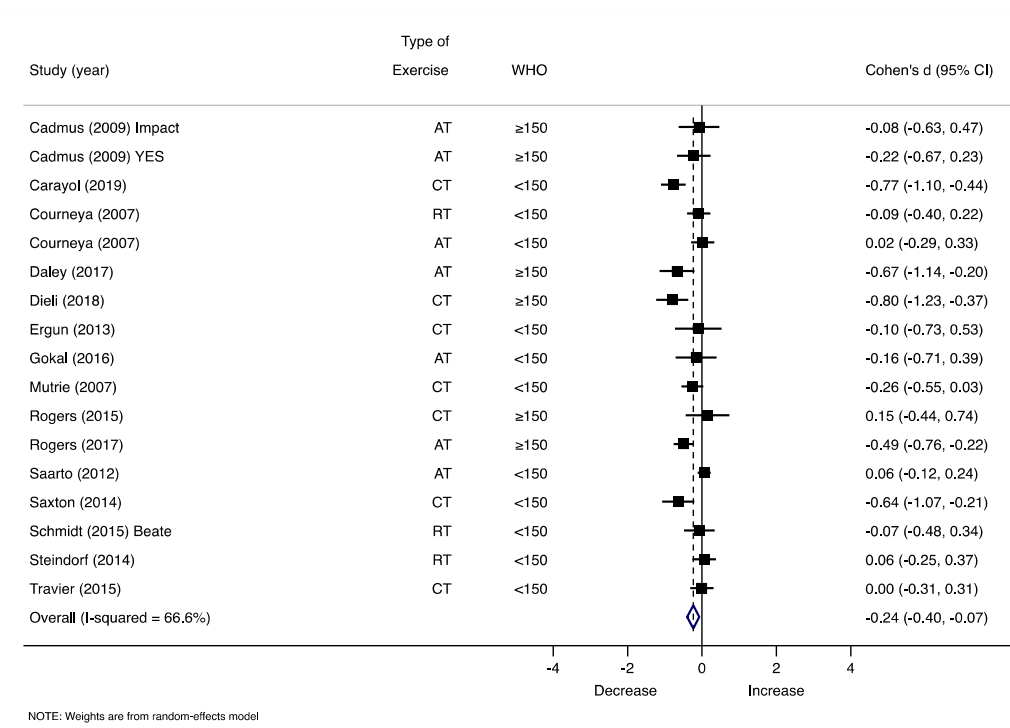

**Figure S7.** Forest plot about the exercise effects on depression. AT, aerobic training; CT, concurrent training; RT, resistance training.

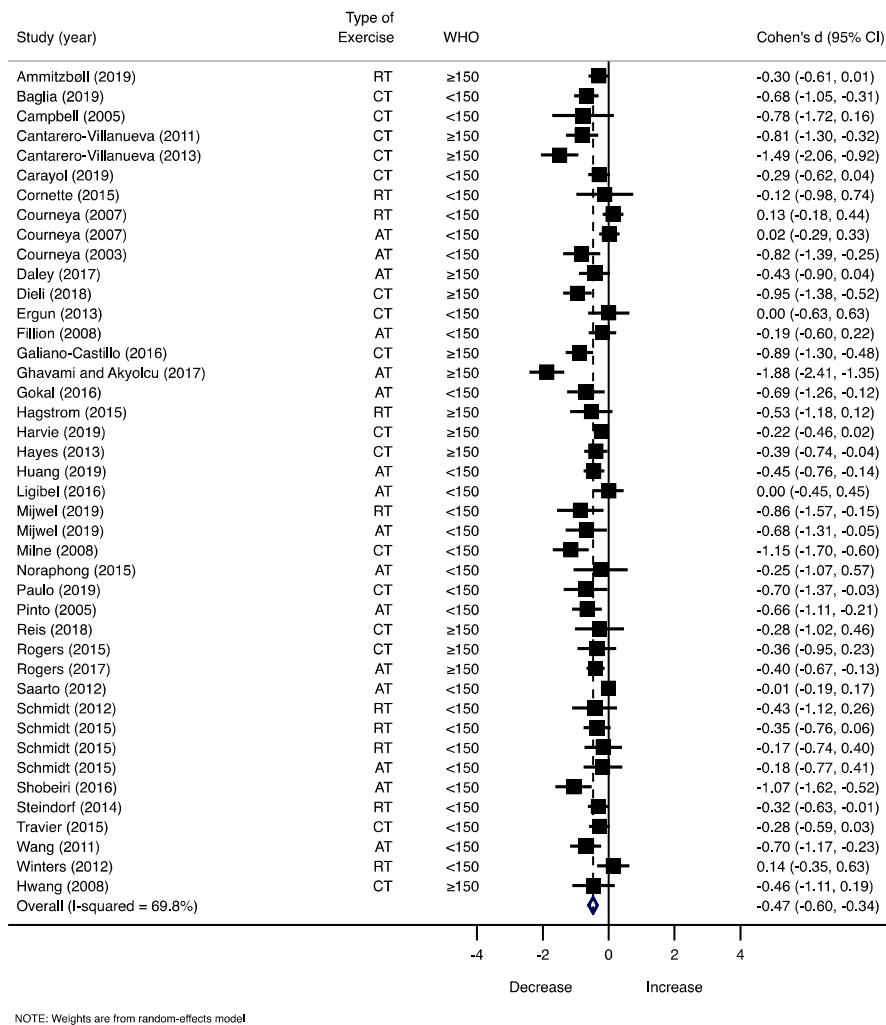

**Figure S8.** Forest plot about the exercise effects on fatigue. AT, aerobic training; CT, concurrent training; RT, resistance training.

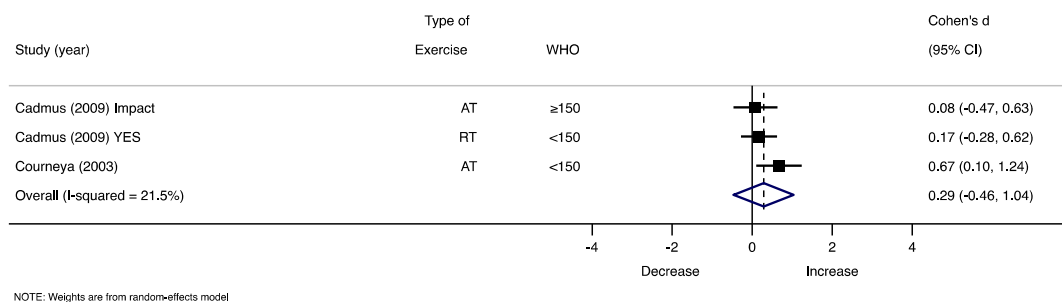

**Figure S9.** Forest plot about the exercise effects on happiness. AT, aerobic training; RT, resistance training.

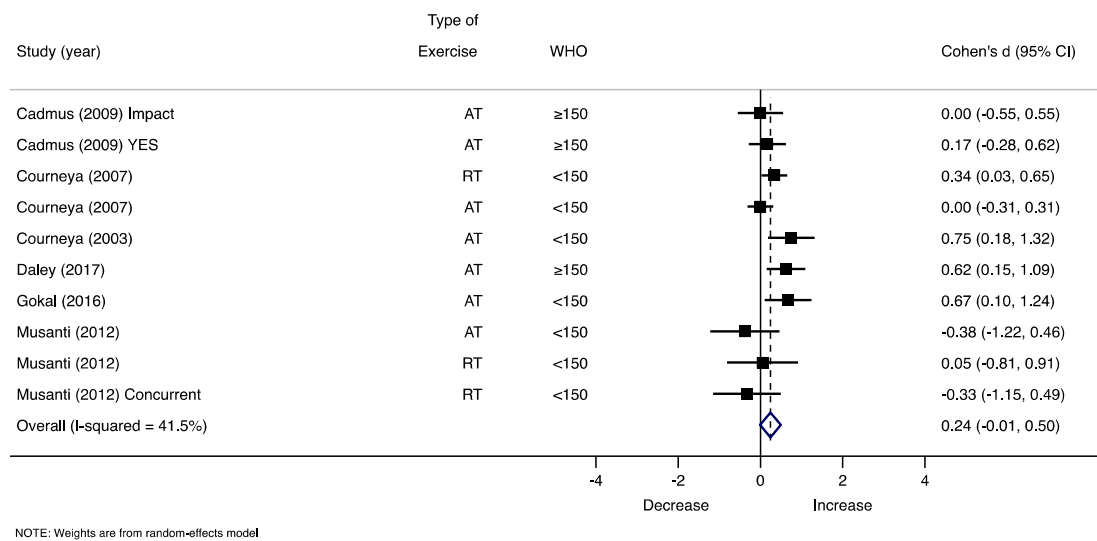

Figure S10. Forest plot about the exercise effects on self-esteem. AT, aerobic training; RT, resistance training.

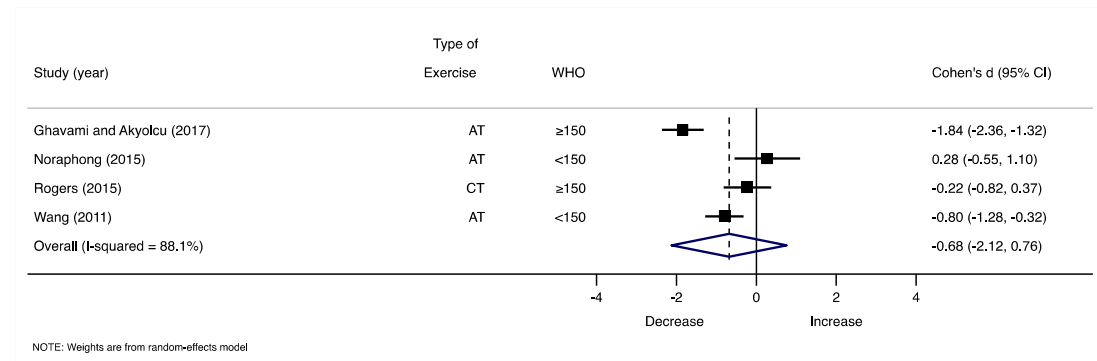

Figure S11. Forest plot about the exercise effects on sleep disturbance. AT, aerobic training; CT, concurrent training.

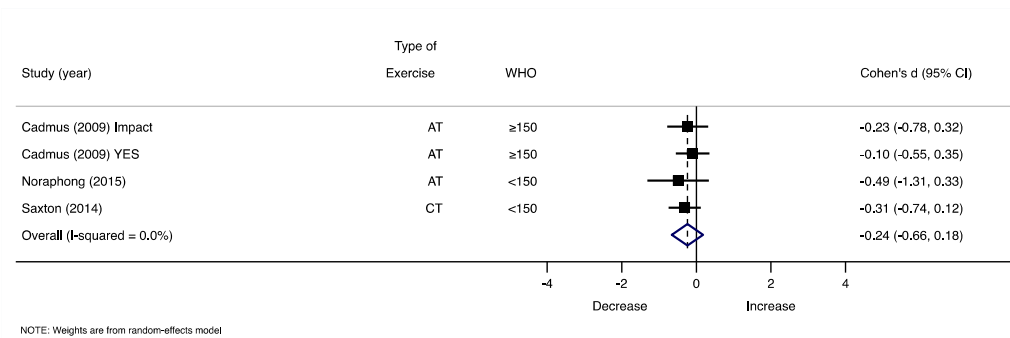

Figure S12. Forest plot about the exercise effects on stress. AT, aerobic training; CT, concurrent training.

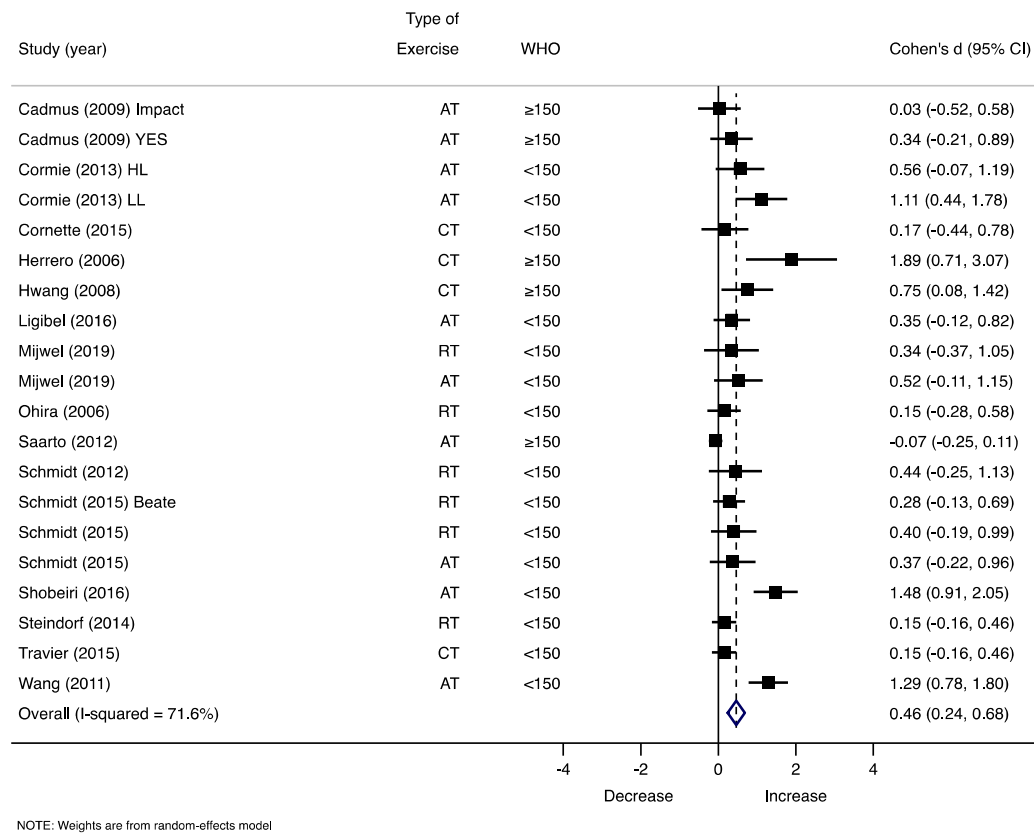

**Figure S13.** Forest plot about the exercise effects on overall quality of life. AT, aerobic training; CT, concurrent training; RT, resistance training.

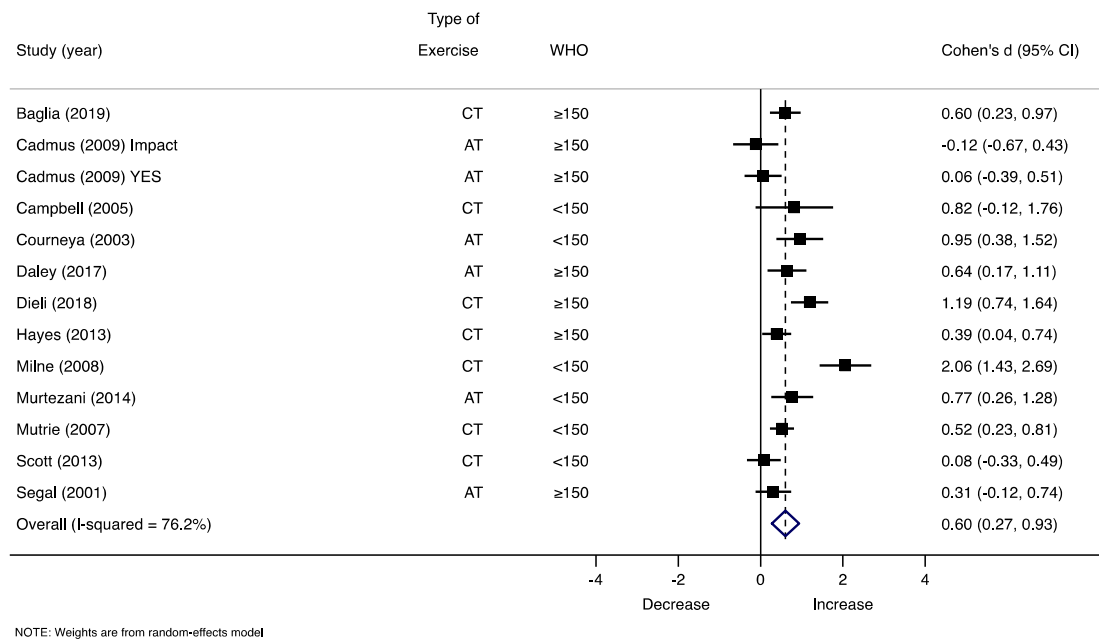

**Figure S14.** Forest plot about the exercise effects on FACT-B questionnaire. AT, aerobic training; CT, concurrent training.



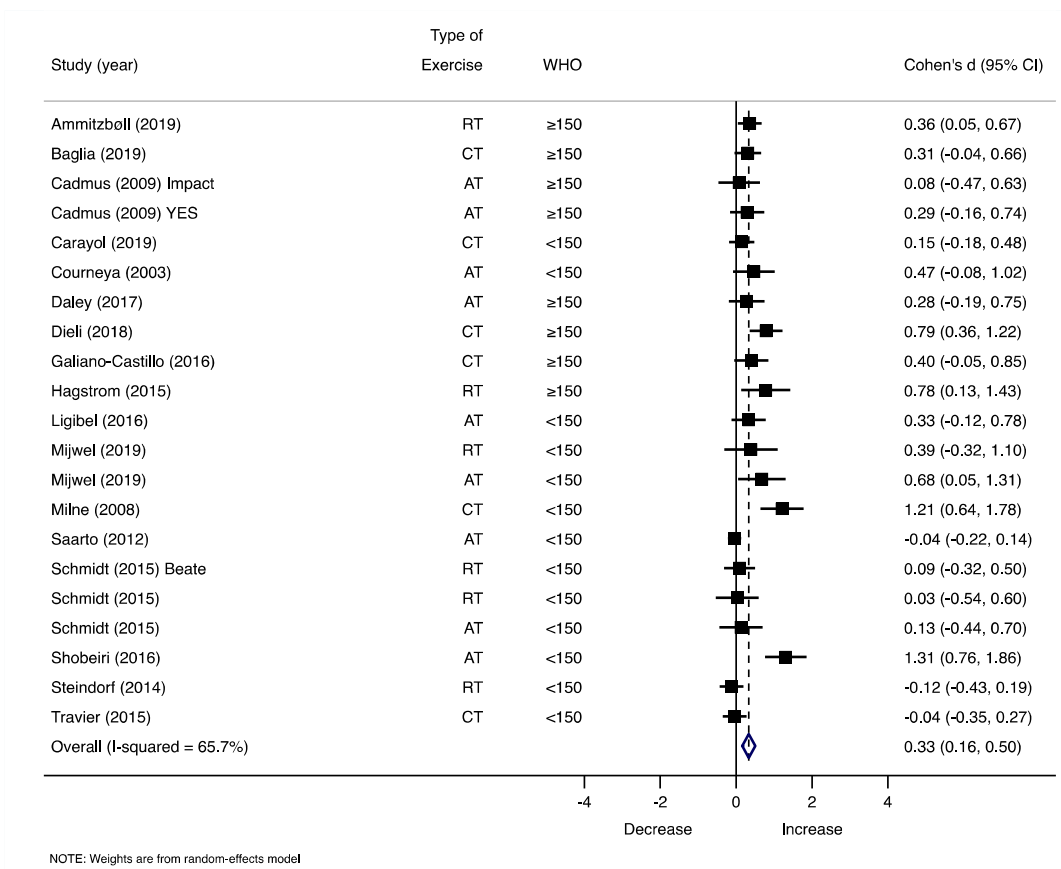

**Figure S15.** Forest plot about the exercise effects on emotional function. AT, aerobic training; CT, concurrent training; RT, resistance training.

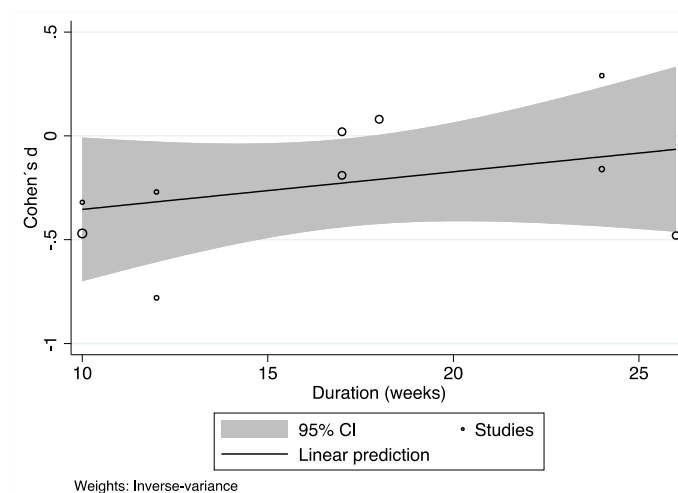

**Figure S16** Association between effects of exercise interventions on anxiety and its duration.

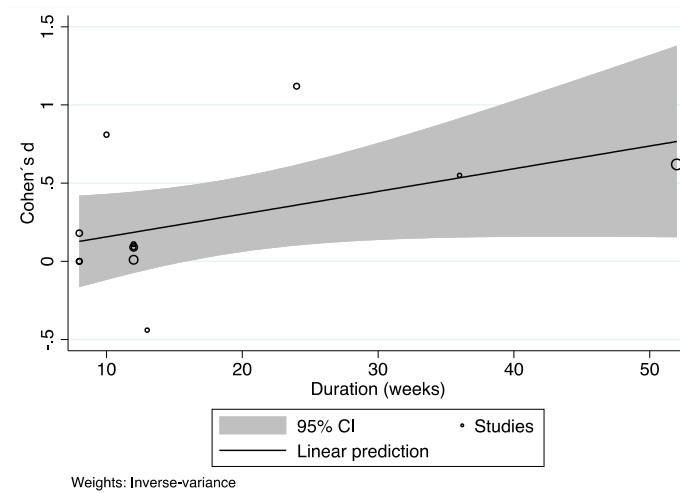

**Figure S17** Association between effects of exercise interventions on body image and its duration.

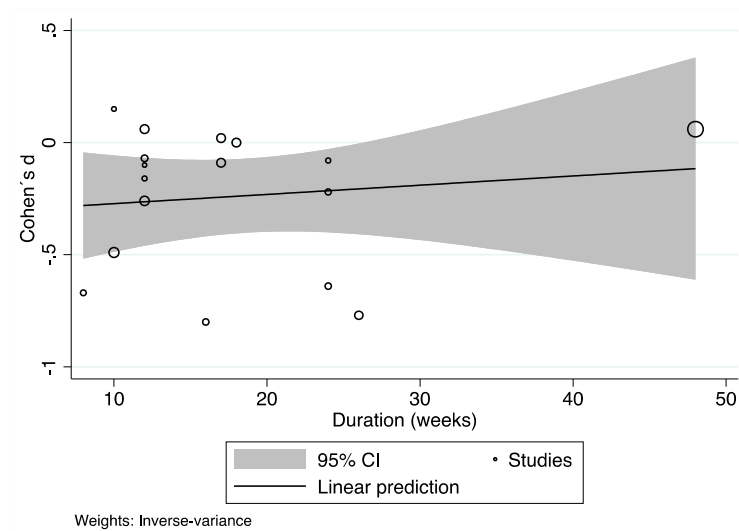

**Figure S18** Association between effects of exercise interventions on depression and its duration.

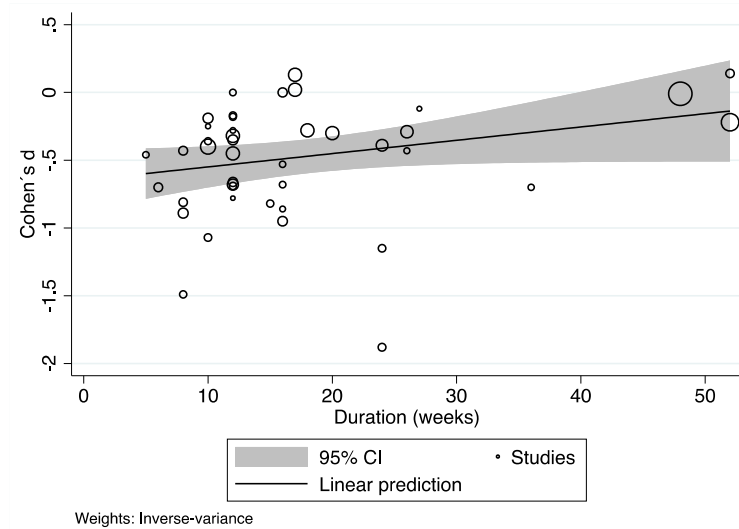

**Figure S19** Association between effects of exercise interventions on fatigue and its duration.

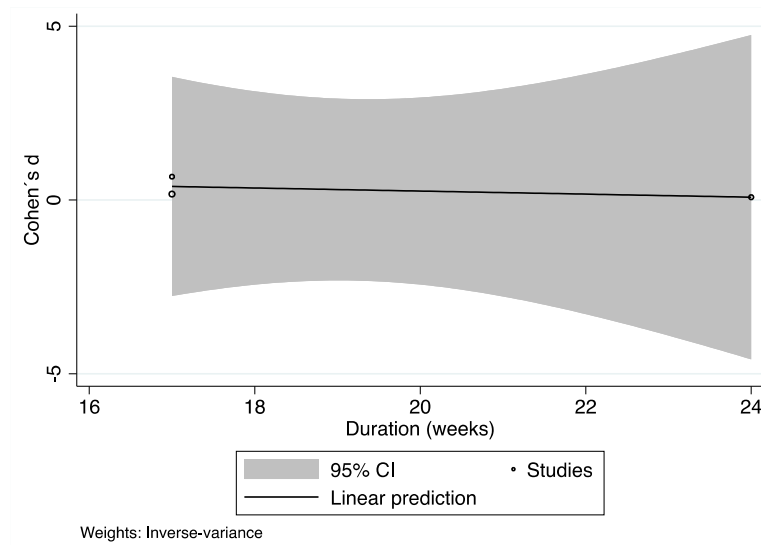

**Figure S20** Association between effects of exercise interventions on happiness and its duration.

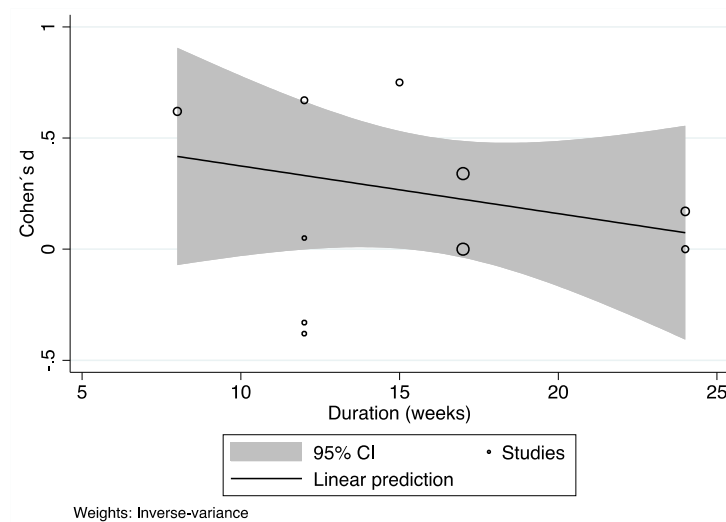

**Figure S21** Association between effects of exercise interventions on self-esteem and its duration.

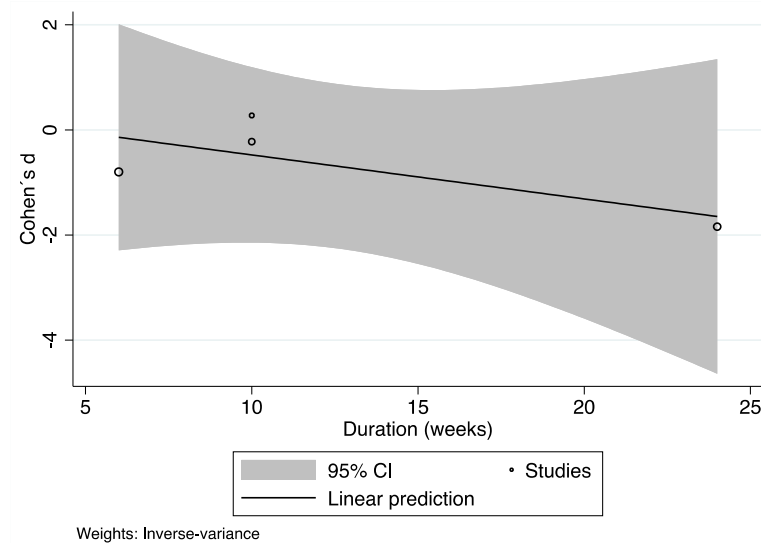

**Figure S22** Association between effects of exercise interventions on sleep disturbance and its duration.

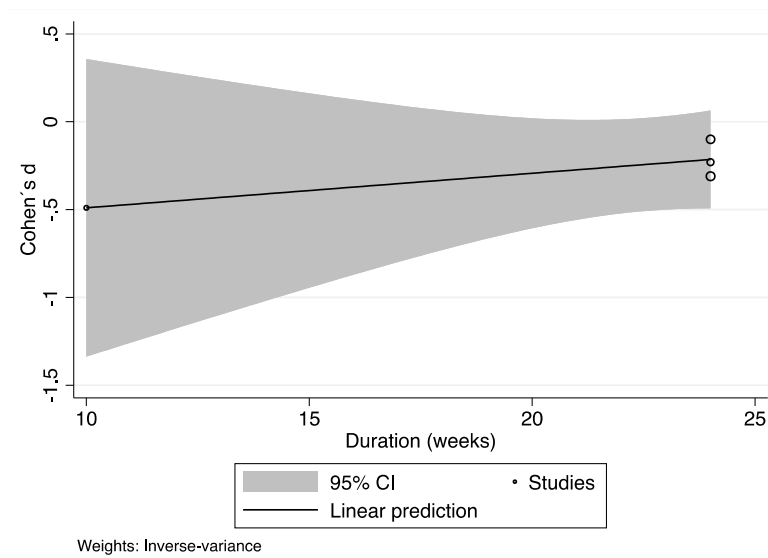

**Figure S23** Association between effects of exercise interventions on stress and its duration.

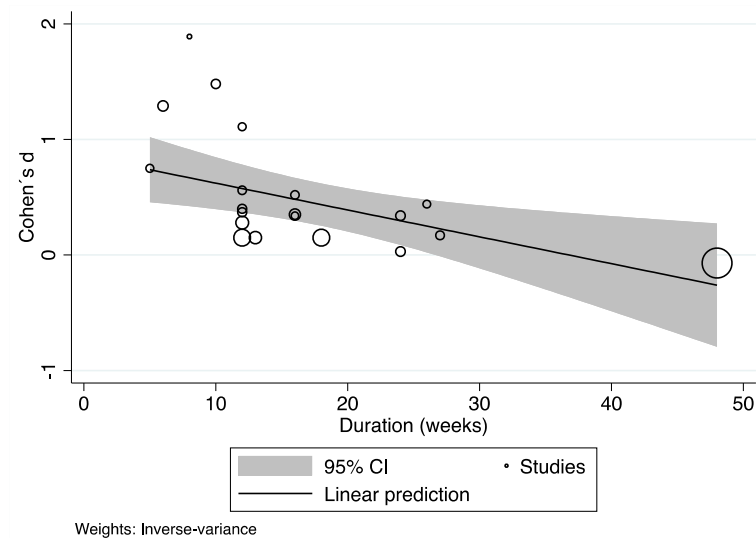

**Figure S24** Association between effects of exercise interventions on overall quality of life and its duration.

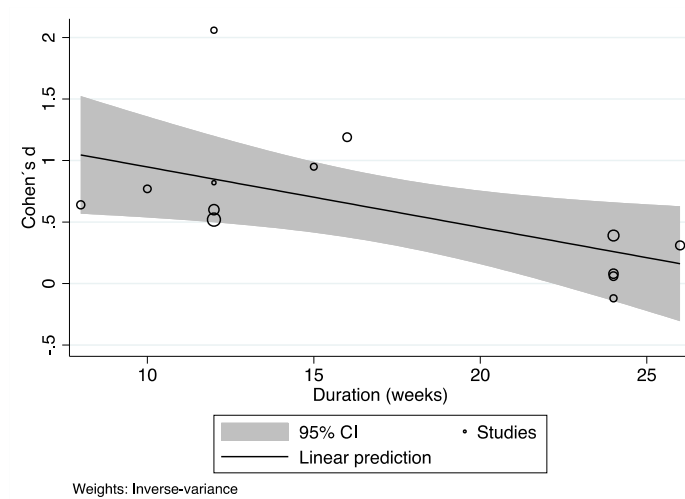

**Figure S25** Association between effects of exercise interventions on FACT-B questionnaire and its duration.

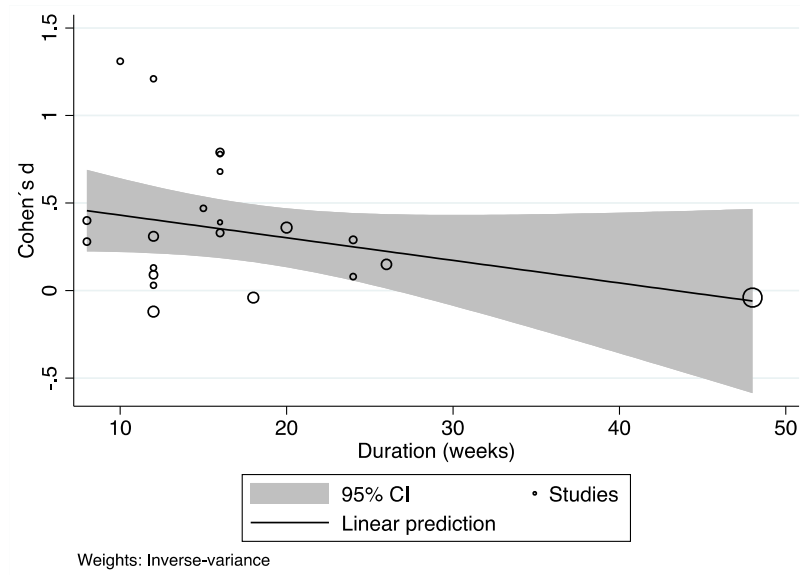

Figure S26 Association between effects of exercise interventions on emotional function and its duration.

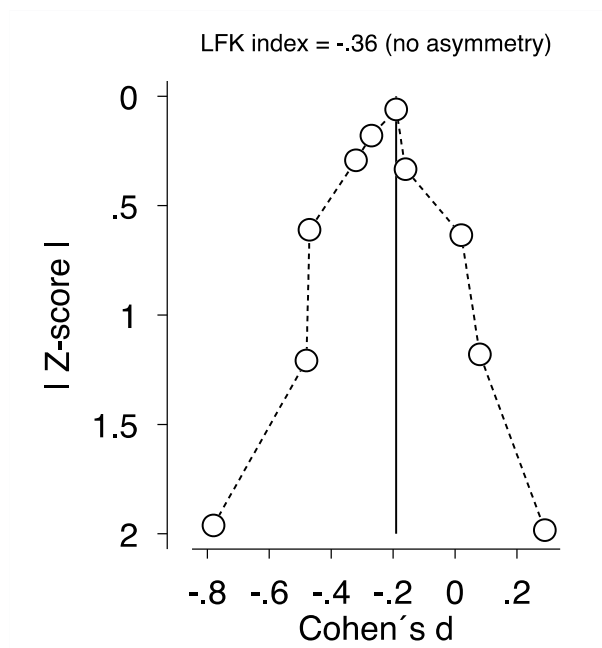

Figure S27 Doi plot depicting possible small-study effects on anxiety.

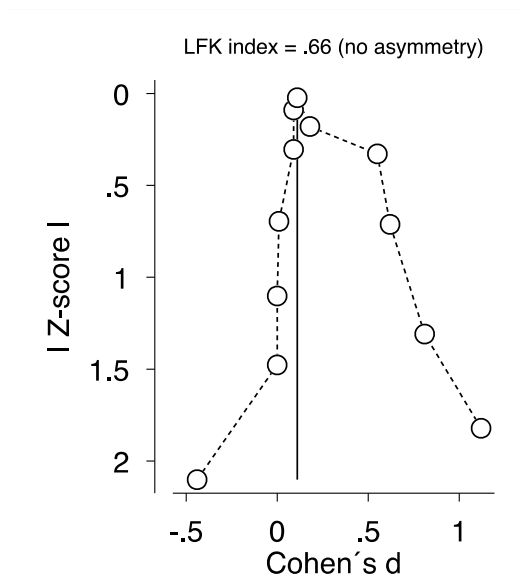

Figure S28. Doi plot depicting possible small-study effects on body image.

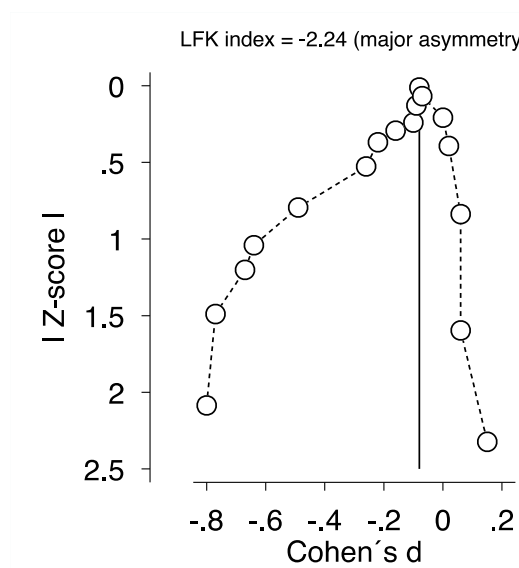

Figure S29. Doi plot depicting possible small-study effects on depression.

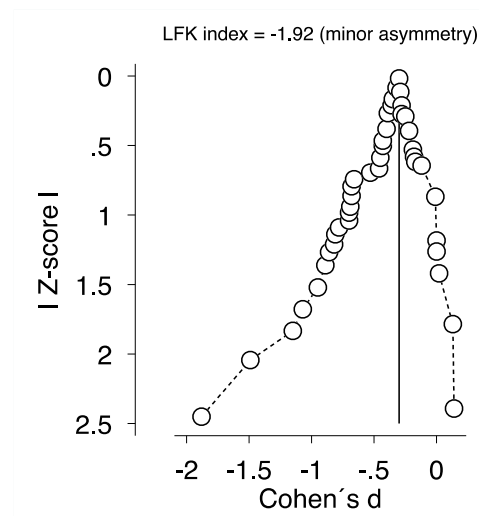

Figure S30. Doi plot depicting possible small-study effects on fatigue.

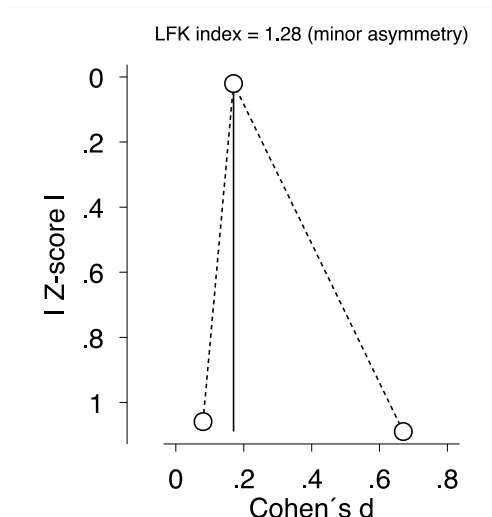

Figure S31. Doi plot depicting possible small-study effects on happiness.

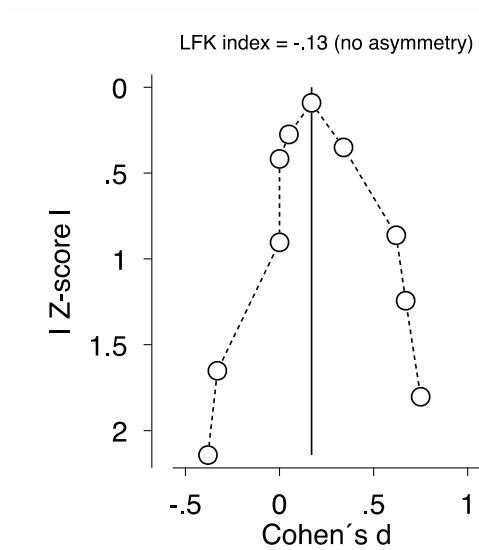

Figure S32. Doi plot depicting possible small-study effects on self-esteem.

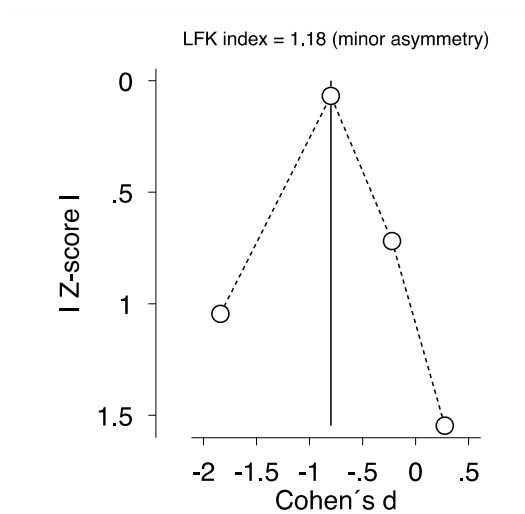

Figure S33. Doi plot depicting possible small-study effects on sleep disturbance.

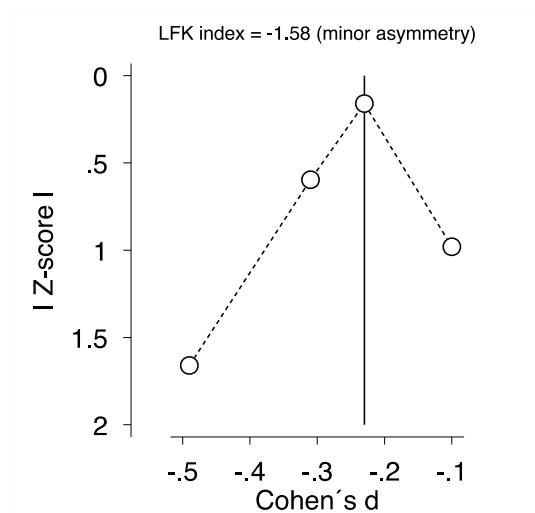

Figure S34. Doi plot depicting possible small-study effects on stress.

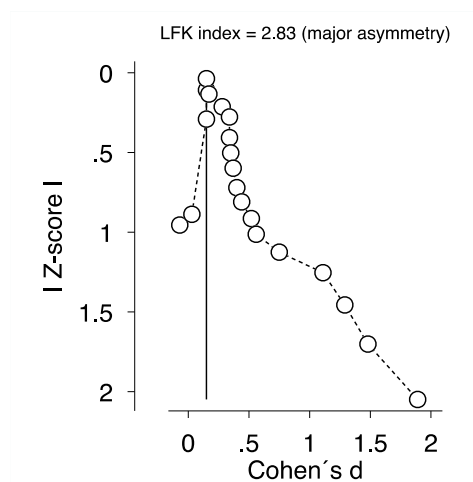

Figure S35. Doi plot depicting possible small-study effects on overall quality of life.



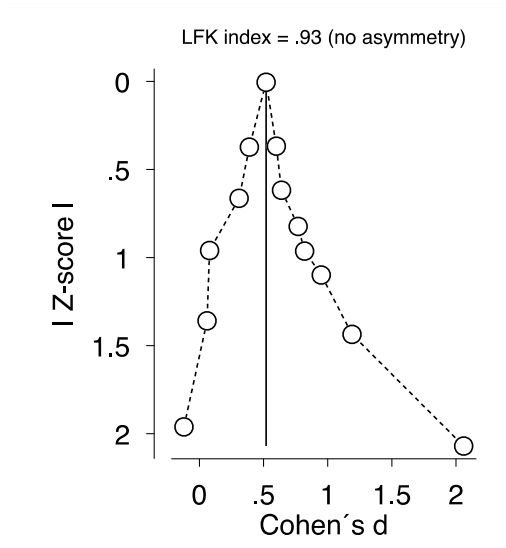

Figure S36. Doi plot depicting possible small-study effects on FACT-B questionnaire.

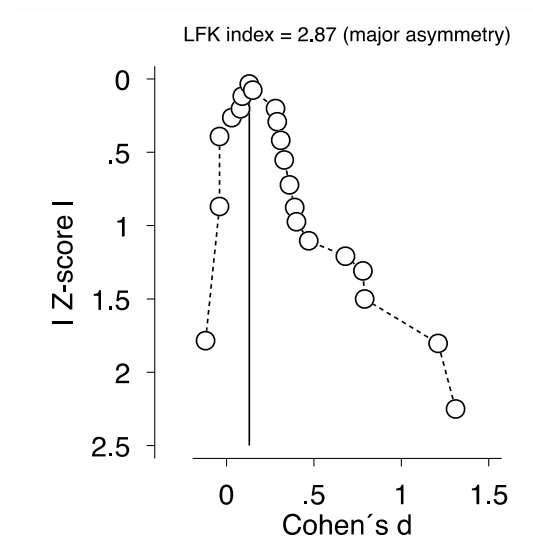

Figure S37. Doi plot depicting possible small-study effects on emotional function.
